# Supplementary material for: Limited Role of Rhamnolipids on Cadmium Resistance for an Endogenous-Secretion Bacterium
Source: MDPI journal article supplement (doi:10.3390/ijerph191912555), 2022-10-01
Supplement: s1 [file s1]

---

**Supplementary Information for**  
**Limited role of rhamnolipids on cadmium resistance for an endogenous-secretion bacterium**

Sufang Xing<sup>1</sup>, Zhen Yan<sup>1</sup>, Chao Song<sup>1</sup>, Huifang Tian<sup>1</sup>, and Shuguang Wang<sup>1,2\*</sup>

1 Shandong Key Laboratory of Water Pollution Control and Resource Reuse, School of Environmental Science and Engineering, Shandong University, Qingdao 266237, China

2 Sino-French Research Institute for Ecology and Environment (ISFREE), School of Environmental Science and Engineering, Shandong University, Qingdao 266237, China

\*Corresponding author Shu-Guang Wang

E-mail: wsg@sdu.edu.cn

---

**Blue agar test.** Blue agar could be used to performing to detect the secretion of biosurfactants by minimal agar medium containing 0.04% cetyl trimethyl ammonium bromide (CTAB), and 0.02% methylene blue [59]. 2.5  $\mu$ L of media was added to blue agar plate and incubated for 72 h at 37 °C. The presence of biosurfactants was confirmed by the development of deep blue color halos around the colony.

**Surface tension measurement.** Bacterial cells cultivated in LB media with series of Cd<sup>2+</sup> concentrations, and reached stable period. Supernatant harvested from bacterial media by centrifugation.

**Emulsifying activity.** Emulsification was used to measure the effectiveness of biosurfactants. Emulsifying activity was determined by mixing the bacterial-free supernatants with equal amounts of hydrophobic solvents (paraffin oil), vortexed the mixtures and static setting at room temperature. Bacterial-free supernatants obtained from range of Cd<sup>2+</sup> concentrations (0, 5, 20, 50, 200 mg/L). The emulsification index (EI) was measured each 24 h, which determined as follows [60]:

$$EI = (\text{Height of the emulsified layer}) / (\text{Total height of the liquid column}) \times 100\% \quad (1)$$

**Critical Micelle Concentration.** Determination of critical micelle concentration (CMC) of semi-purified rhamnolipids were performed in aqueous solution.

**FTIR Assay.** The molecular structure of semi-purified rhamnolipids were measured by FT-IR spectra. The extracted rhamnolipids from different bacterial media were completely dried to powder by freeze drying, and analysis using a spectrum (Nicolet iS50). The measurement condition was chosen as follows: the spectral range from 4000 cm<sup>-1</sup> to 400 cm<sup>-1</sup>, 32 scans with 4 cm<sup>-1</sup> resolution [61].

**Quantitative real-time PCR Assay.** Quantitative real-time PCR (RT-qPCR) was used to measure the expressions of the three related genes to rhamnolipids synthesis (*rhlA*, *rhlB* and *rhlC*) in *P. aeruginosa* under Cd stress. Bacteria cultivated by LB media with different concentrations of Cd<sup>2+</sup> (0, 20, 200 mg/L). In this study, 16S rRNA was used as the housekeeping gene. For each sample, a threshold cycle value (CT) was determined, and results were analyzed with the comparative Ct method ( $2^{-\Delta\Delta Ct}$ ) [32,62]. Total RNA was isolated from collected bacterial cells according to the standard protocol. The quantity and quality of RNA samples were assessed with Thermo NanoDrop One Spectrophotometer (Thermo Scientific). Subsequently, total RNA was reverse transcribed using M5 First Strand cDNA Synthesis Kit (Mei5 Biotechnology. Co., Ltd, Beijing, China). Details of this experiment have shown in *Supporting Information*. The primers for RT-qPCR were designed as showed in Table S2.

For the total RNA extraction, the bacterial cultures (10 mL for each) were sampled at the stable phase. Total RNA was extracted using M5 EASYspin Plus Bacterial RNA Extraction Kit (Mei5 Biotechnology. Co., Ltd, Beijing, China) according to the instructions. Cultivation samples were prepared for three replicates. The experiments were performed by the Realtime PCR Super mix (SYBR green, with anti-Tap) manufacturer's instructions. Thermal cycle sited as on cycle of 95 °C for 1 min, followed by 40 cycles of 95 °C for 15 s, 57.5 °C for 30s, and 72 °C for 15 s, followed by melt curve analysis. All amplifications were performed in triplicate. The total PCR volume was 20  $\mu$ L, each PCR run included a control well containing ddH<sub>2</sub>O for negative control for each gene. The reaction efficiencies were calculated using the equation  $E = 10^{(-1/\text{slope})}$  from the slope was measured using 5-fold gradient dilution. Reaction efficiencies of all primers were above 90% in this experiment.

---

**Figure S1** The schematic of pEX18GM- $\Delta rhlAB$  plasmid construction.

**Figure S2** DNA gel electrophoresis (A), rhamnolipids secretions (B), and CTAB-MB plate (C) to verified the  $\Delta rhlAB$  strain could not secreted rhamnolipids.

**Figure S3** Distribution of cadmium for the wild-type and the  $\Delta rhlAB$  strains under different  $Cd^{2+}$  concentrations (5, 200 mg/L).

**Figure S4** ATPase activity( $Na^+/K^+$ , and  $Ca^{2+}/Mg^{2+}$ ) assays for the wild-type and the  $\Delta rhlAB$  strains which expressed in U per g proteins.

**Figure S5** ATR-FTIR assays for semi-purified rhamnolipids from the wild-type under a series of  $Cd^{2+}$  concentrations.

**Figure S6** Expression of genes of the wild-type under the stress of Cd.

**Table S1** Plasmids and bacteria used in this study.

**Table S2** The primers and sequences for *rhlA-rhlB* deletion and qPCR.

**Table S3** Assignments of FTIR spectra of rhamnolipids.

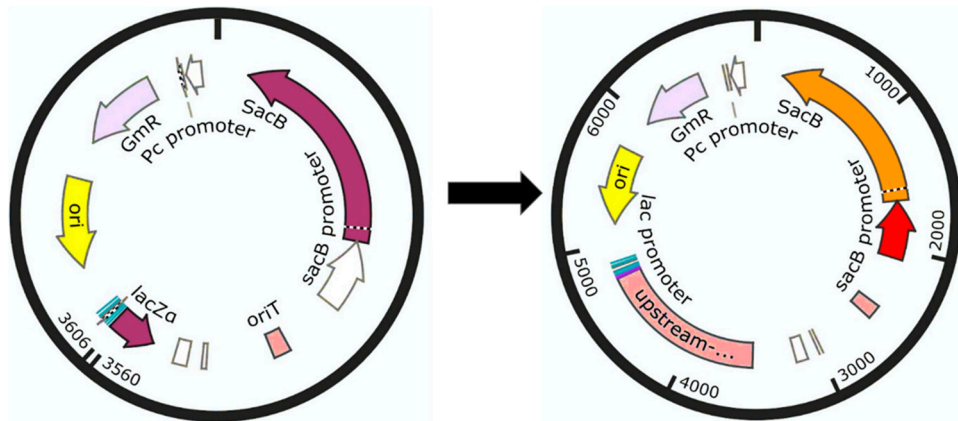

**Figure S1** The schematic of pEX18GM- $\Delta rhlAB$  plasmid construction.

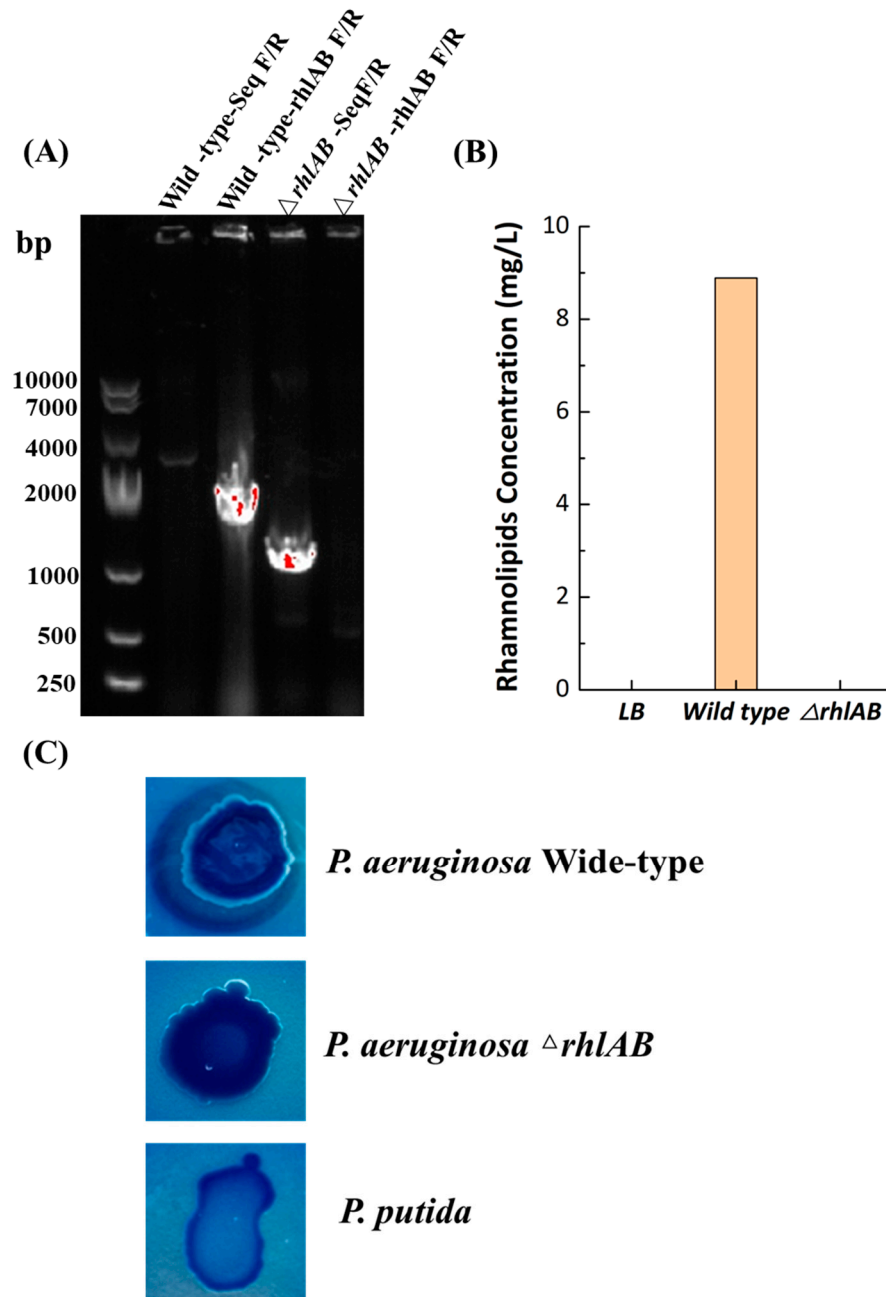

**Figure S2** DNA gel electrophoresis (A), rhamnolipids secretions (B), and CTAB-MB plate (C) to verified the  $\Delta rhlAB$  strain could not secreted rhamnolipids.

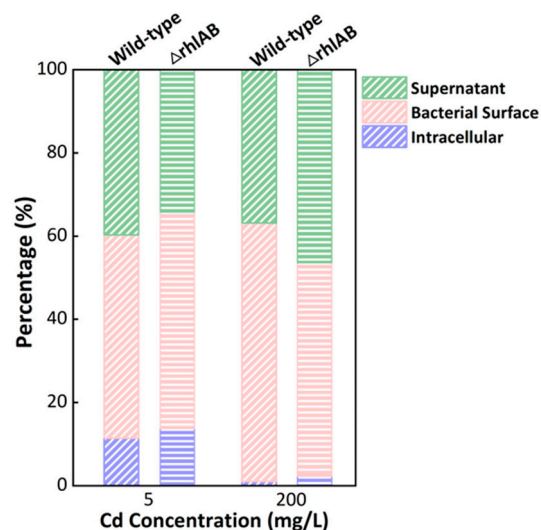

**Figure S3** Distribution of cadmium for the wild-type and the  $\Delta rhIAB$  strains under different  $Cd^{2+}$  concentrations (5, 200 mg/L).

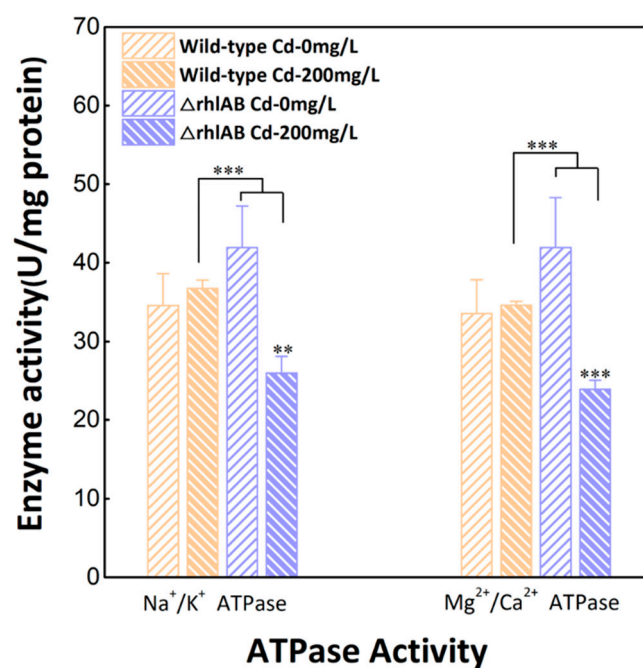

**Figure S4** ATPase activity ( $Na^+/K^+$ , and  $Ca^{2+}/Mg^{2+}$ ) estimation for the wild-type and the  $\Delta rhIAB$  strains which expressed in U per mg proteins.

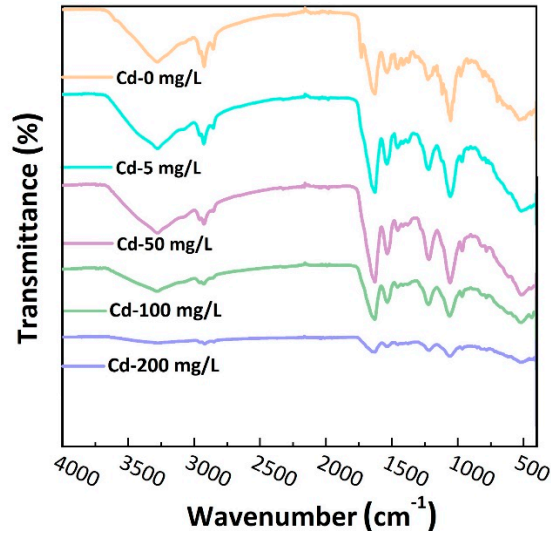

**Figure S5** ATR-FTIR assays for semi-purified rhamnolipids from the wild-type under a series of Cd<sup>2+</sup> concentrations (0, 5, 50, 100, 200 mg/L).

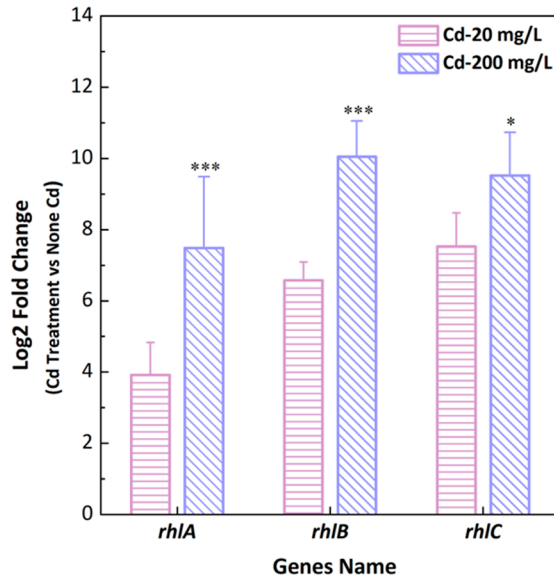

**Figure S6** Expression of genes of the wild-type under the stress of Cd.

**Table S1.** Plasmids and bacteria used in this study.

| Name                                 | Description and pertinent features                                                            |
|--------------------------------------|-----------------------------------------------------------------------------------------------|
| Bacteria                             |                                                                                               |
| <i>P. aeruginosa</i>                 | Wild type                                                                                     |
| <i>E. coli</i> MW3084                | With pEX18GM                                                                                  |
| <i>E. coli</i> MW3084 $\Delta rhlAB$ | In this study                                                                                 |
| Vector                               |                                                                                               |
| pEX18GM                              | Gm <sup>r</sup> , <i>oriT</i> , <i>sacB</i> , <i>lacZ<math>\alpha</math></i> , MCS from pUC18 |
| pEX18GM $\Delta rhlAB$               | In this study                                                                                 |

**Table S2** The primers and sequences for *rhlA-rhlB* deletion and qPCR.

| Primers  | Sequence (5'→3')                      |
|----------|---------------------------------------|
| XSf-LF   | GAATTCGTAATCATGGTCATAGCTGTTTCC        |
| XSf-LR   | AAGCTTGGCACTGGCCGTC                   |
| XSf-UF   | GCCAGTGCCAAGCTTTGACCCTCGAGTTCTCCAAT   |
| XSf-UR   | CAGCACCGTTCAGGACGCGCGCCGCATAAAAAATTTT |
| XSf-DF   | GCTGCGTCCTGAACGGTGCTG                 |
| XSf-DR   | CATGATTACGAATTCCCGCAGGCGGATTTCCT      |
| XSf-UDF  | GCCAGTGCCAAGCTTTGACCCTCGAGTTCTCCAAT   |
| XSf-UDR  | CATGATTACGAATTCCCGCAGGCGGATTTCCT      |
| rhlA-F   | AGACCGTCGGCAAATACCTG                  |
| rhlA-R   | TGCCGTTGATGAAATGCACG                  |
| rhlB-F   | CCGGTACACCCCAAGTTCAA                  |
| rhlB-R   | GGGATACTGCCGTCGAACAG                  |
| rhlC-F   | ATCCATCTCGACGGACTGAC                  |
| rhlC-R   | CGGAGGAGATCAGGAACGAG                  |
| 16S-341F | CCT ACG GGA GGC AGC AG                |
| 16S-518R | ATT ACC GCG GCT GCT GG                |

**Table S3** Assignments of FTIR spectra of rhamnolipids.

| Wavenumber(cm <sup>-1</sup> ) | Assignments                                                                                      |
|-------------------------------|--------------------------------------------------------------------------------------------------|
| 3270-3277                     | hydroxyl group free stretch due to H-bond interaction between groups of rhamnolipids             |
| 2970-2850                     | C-H stretching vibrations of biosurfactants preformed the hydrocarbon sites in backbone          |
| 1627                          | carbonyl stretching with strong-intensity bands                                                  |
| 1535                          | -COO <sup>-</sup>                                                                                |
| 1455-1370                     | aliphatic bonds stretching                                                                       |
| 1300-1033                     | C-O stretch confirmed the bonds between carbon and hydroxyl groups in the structures of rhamnose |
| 3026-3084                     | hydroxyl group                                                                                   |
| 1729                          | carbonyl stretching with strong-intensity bands                                                  |
| 1319                          | aliphatic bonds twisting for fatty acids bands                                                   |
| 1166                          | C-C symmetric stretching for lipids or polysaccharides                                           |
